# Supplementary material for: Sub-Lethal 5-Fluorouracil Dose Challenges Planarian Stem Cells Promoting Transcriptional Profile Changes in the Pluripotent Sigma-Class Neoblasts
Source: MDPI journal article supplement (doi:10.3390/biom11070949), 2021-06-26
Supplement: s1 [file s1]

**Table S1**

**A) Distribution of 5FU specimens with respect to *DjsoxP-1* signal intensity vs control specimens 7 and 10 days after treatment. MGV=mean grey value**

|                                                              | Number of analyzed specimens                | % of 5FU animals with a MGV lower than the mean of control MGV | % of 5FU animals with a MGV lower than the half of the mean of control MGV |
|--------------------------------------------------------------|---------------------------------------------|----------------------------------------------------------------|----------------------------------------------------------------------------|
| <i>DjsoxP-1</i> expression level at day 7 after treatment    | 18 specimens from 3 independent experiments | 83%                                                            | 55%                                                                        |
| <i>DjsoxP-1</i> expression level at 10 seven after treatment | 18 specimens from 3 independent experiments | 94%                                                            | 72%                                                                        |

**B) Distribution of 5FU specimens with respect to *DjsoxP-1* expression pattern 22 days after treatment**

|                                                              | Number of analyzed specimens                | Absent expression | Restricted pattern (similar to figure 1B) | Wider pattern (similar to figure S2) |
|--------------------------------------------------------------|---------------------------------------------|-------------------|-------------------------------------------|--------------------------------------|
| <i>DjsoxP-1</i> expression pattern at day 22 after treatment | 50 specimens from 5 independent experiments | 17%               | 32%                                       | 51%                                  |

**C) Distribution of 5FU specimens with respect to *DjsoxP-1* expression pattern 29 days after treatment**

|                                                              | Number of analyzed specimens                | Ventral signal restricted pattern (similar to figure 1B) | Ventral signal wider pattern (similar to figure S2) | Ventral signal widely extended pattern | Ventral and dorsal signal |
|--------------------------------------------------------------|---------------------------------------------|----------------------------------------------------------|-----------------------------------------------------|----------------------------------------|---------------------------|
| <i>DjsoxP-1</i> expression pattern at day 29 after treatment | 50 specimens from 3 independent experiments | 4%                                                       | 4%                                                  | 50%                                    | 42%                       |
